# Supplementary material for: Spinel Mn1.5Co1.5O4 core–shell microspheres as Li-ion battery anode materials with a long cycle life and high capacity
Source: Royal Society of Chemistry journal article supplement (doi:10.1039/c2jm35607d), 2012-01-01
Supplement: c2jm35607d.pdf [file c2jm35607d.pdf]

## Electronic Supplementary Material

### Spinel $\text{Mn}_{1.5}\text{Co}_{1.5}\text{O}_4$ Core-Shell Microspheres as Li-Ion Battery Anode Materials with Long Cycle Life and High Capacity

Jingfa Li,<sup>a</sup> Shenglin Xiong,<sup>\*a</sup> Xiaowei Li<sup>a</sup> and Yitai Qian<sup>a,b</sup>

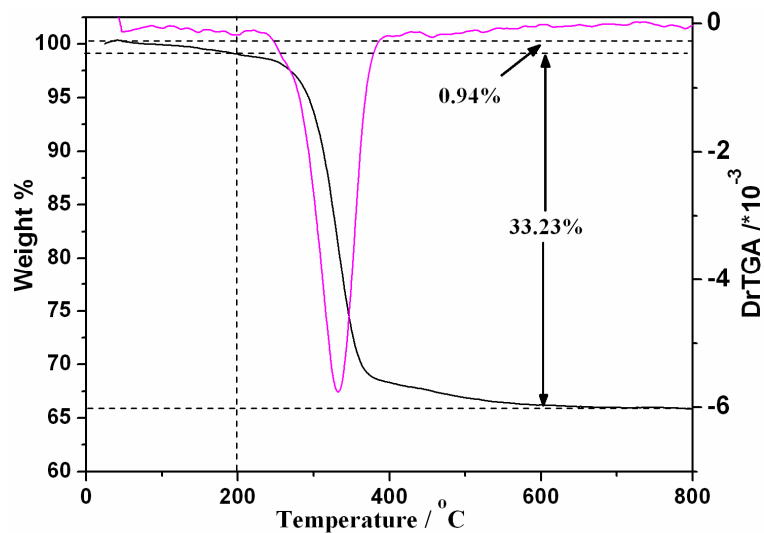

Fig. S-1 TGA and DrTGA curves of the  $\text{Mn}_{0.5}\text{Co}_{0.5}\text{CO}_3$  microspheres under air atmosphere.

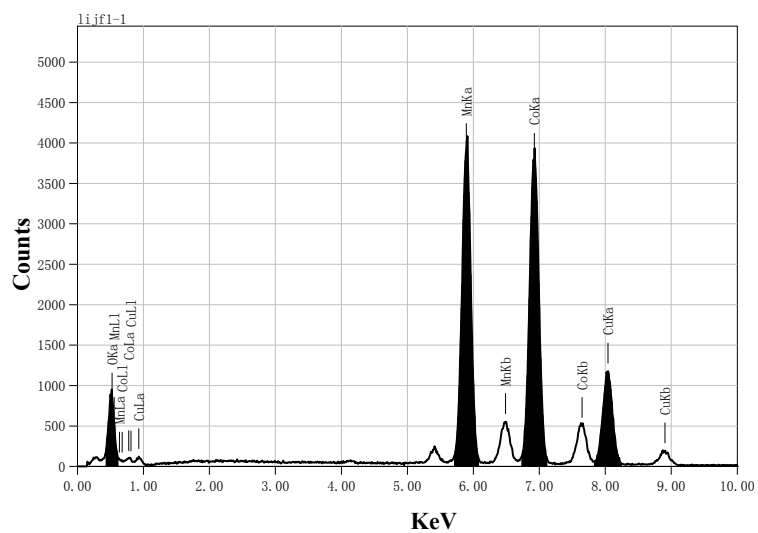

Fig. S-2 EDS spectrum of core-shell like  $Mn_{1.5}Co_{1.5}O_4$  microspheres.

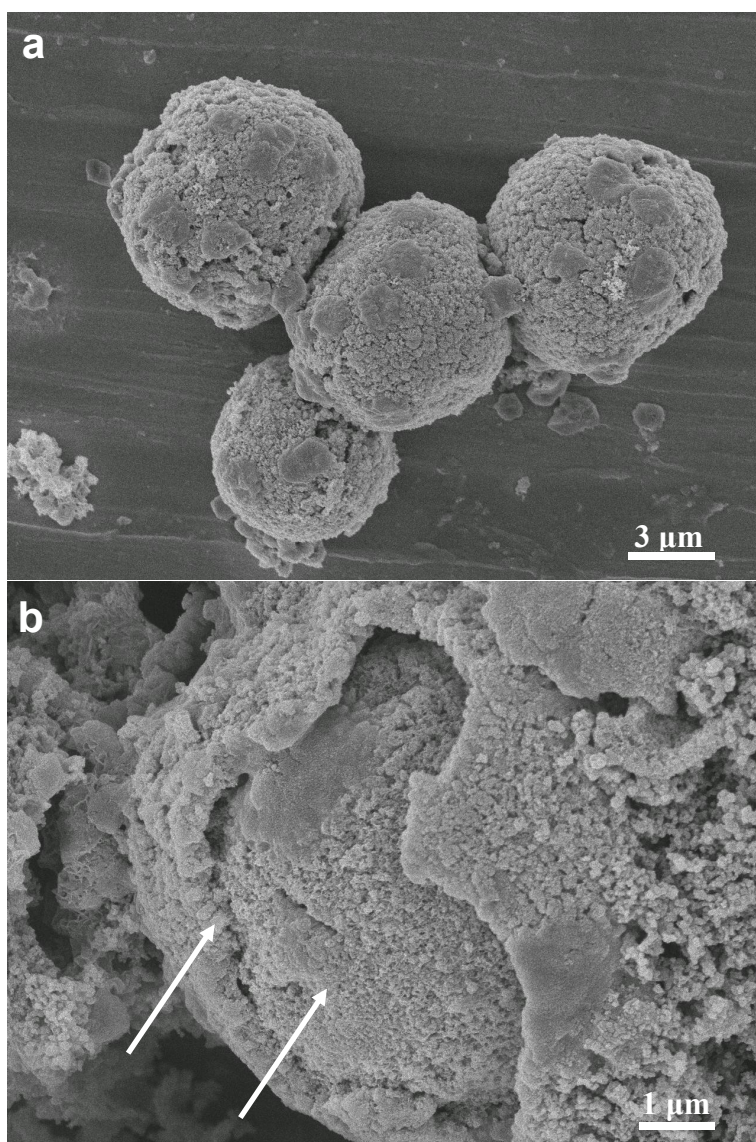

**Fig. S-3.** Low (a) and high magnification (b) FESEM images of the electrode made of  $\text{Co}_{1.5}\text{Mn}_{1.5}\text{O}_4$  core-shell microspheres after 300 cycles testing at  $400 \text{ mA g}^{-1}$ .
